# Supplementary material for: Breathing Planet Earth: Analysis of Keeling’s Data on CO2 and O2 with Respiratory Quotient (RQ), Part II: Energy-Based Global RQ and CO2 Budget
Source: MDPI journal article supplement (doi:10.3390/en17081800), 2024-04-09
Supplement: s1 [file s1]

*Supplement Part II : Estimations of CO<sub>2</sub> Distribution (GT/year) Amongst Atmosphere, Land Biomass, Ocean Biomass and Ocean Storage*

The data collected for estimations of the CO<sub>2</sub> budget amongst the atmosphere, land biomass, ocean biomass and ocean storage and the method of estimations of CO<sub>2</sub> distribution in GT/year are summarized below.

1. One may convert Peta moles into mass units in GT/year knowing the molecular weights of species of interest.
2. The energy released from fossil fuels (FF),  $E_{FF} = 408.250$  Exa J
3. Get data on energy from land use (ELU). If ELU is not available, estimate energy release from C emission data from land use (CLU). For C data,  $CLU = 1.418$  GT/year in 2006 [23]. But C in GT per Exa J = 0.027 and hence  $ELU = 1.418/0.027 = 51.96$  Exa J.
4. Total energy ( $E_{tot}$ ) released due to both  $E_{FF} + ELU = E_{tot} = 460.2$  Exa J.
5. Estimate the O<sub>2</sub> consumed due to FF and LU,  $O_{2 \text{ sink, tot}}$ , Peta moles:

$$Q_{\text{Consumption}}(FF+LU) \frac{\text{Peta moles}}{\text{year}} = 222 \times 10^3 \times \frac{E_{FF} + ELU}{E_{\text{mol}}} \left( \frac{\text{Exa J}}{\text{year}} \right), \quad H_{\text{O}_2} = 0.4810^3 \text{ Exa J per mole} \quad \text{Equation 1}$$

With 2006 FFLU energy in Exa J per year = 460.21, O<sub>2</sub> consumption rate = 1.027 Peta moles/year in 2006

6. Make linear and quadratic curve fits to Keeling's data on CO<sub>2</sub> and O<sub>2</sub> in ppm vs year and obtain the constants  $a_1, b_1, \dots, d_1, d_2$ .
7. Estimate O<sub>2</sub> supplied by atm {O<sub>2 sink, atm</sub>}. Since  $d[O_2]/dt$ , ppm/year =  $b_1$  (linear plot, negative) or  $d_2 \times \text{years since 1991} + d_1$  (quadratic fit), O<sub>2 sink, atm</sub>, Peta moles of O<sub>2</sub> supplied by atm per year =  $0.178 \times b_1$  (linear fit) or  $d_2 \times (2006-1991) + d_1$  (quadratic fit) assuming atm air moles =  $1.77 \times 10^5$  Peta moles. With  $b_1 = -4.438$  ppm/year (linear fit on O<sub>2</sub>), |O<sub>2 sink, atm</sub>|, Peta moles of O<sub>2</sub>/year = 0.789. While FF and LU require 1.027 Peta moles /year.
8. Estimate O<sub>2</sub> source from land ocean water biomass (LOWBM). The difference between moles consumed for energy release (FF+LU) and O<sub>2</sub> supplied by atm is the O<sub>2</sub> produced by land and ocean biomass. Thus, O<sub>2 LOWBM</sub> (Peta moles/year) =  $1.027 - 0.789 = 0.238$  Peta moles /year
9. Calculate  $x = O_2 \text{ moles produced} / O_2 \text{ moles consumed for energy release} = O_{2 \text{ LOWBM produced}} / O_{2 \text{ sink, tot}} = 0.232$  or 23.2% of O<sub>2</sub> required for energy release is produced by (LOWBM). See Table 2 for relations.
10. Estimate the CO<sub>2</sub> emission from FF using  $RQ_{FF}$ . For FF,  $RQ = 1$  if coal is used worldwide, =0.5 if natural gas is used worldwide, or determine  $RQ_{FFLU}$  if worldwide data on CO<sub>2</sub> and world FF energy consumption are known since CO<sub>2</sub> in GT/year per Exa J =  $0.1 \times RQ_{FF}$ ; thus  $RQ_{FF} = 0.75$ .

11. For the RQ of LU, and if that energy from LU is mostly biomass, then  $RQ_{LU}=1$ . Then for RQ for FF+ LU is given as  $RQ_{FFLU} = RQ_{FF} * EF_{FF} + RQ_{LU} * EF_{LU}$ , where  $EF_{FF} = \{O_2 \text{ by FF/O}_2 \text{ total}\}$ .  $EF_{LU} = \{O_2 \text{ by LU/O}_2 \text{ total}\}$ ,  $RQ_{FFLU} = 0.778$
12. Estimate  $CO_2$  release from FF and LU.  $CO_{2 \text{ FFLU}}$ , Peta moles/year =  $0.778 * 1.027 = 0.799$
13. Estimate the RQ of LOWBM.  $RQ_{LBM} = 1$ .  $RQ_{OWBM} = 0.87$  (Phytoplankton). For the RQ of LOWBM, splitting  $O_2$  produced by ocean-based biomass and land-based biomass is required. The parameter "z" represents a fraction of  $O_2$  produced from OWBM.  $RQ_{LOWBM} = RQ_{LBM} * \{1-z\} + RQ_{OWBM} * z$ . Since ocean covers 70% of earth's area,  $z \approx 0.7$ ,  $RQ_{LOWBM} = 0.909$ .
14. Estimate  $CO_2$  sink from LOWBM.  $CO_2$  sink with land and ocean biomasses =  $RQ_{LOWBM} * \{O_2 \text{ production rate from biomass}\}$ ,  $CO_{2 \text{ sink, LOWBM}} = 0.909 * 0.238 = 0.216$  Peta mols/year  
or  $CO_2$  sink via LBM and OWBM, GT/year =  $44.01 * RQ_{LOWBM} * x * O_2 \text{ in Peta mols by FFLU/year}$
15. Estimate the  $CO_2$  stored by atm  $\{CO_{2 \text{ st, atm}}\}$ . Since  $d [CO_2]/dt$ , ppm/year =  $a_1$  (linear plot, positive) or  $c_2 * \text{years since 1991} + c_1$  (quadratic fit),  $CO_{2 \text{ st, atm}}$ , Peta moles per year =  $0.178 * a_1$  {linear fit} or  $c_2 * (2006-1991) + c_1$  (quadratic fit) assuming atm air moles =  $1.77 \times 10^{20}$  moles. With  $a_1 = 2.789$  ppm/year (linear fit on  $O_2$ ),  $|CO_{2 \text{ st, atm}}|$ , Peta moles/year = 0.370.
16. Calculate  $CO_2$  stored by OW using  $CO_2$  balance.  $CO_2$  release from FF and LU =  $O_2 \text{ moles consumed} * RQ_{FFLU} = 1.027 * 0.778 = 0.799$  Peta moles/year,  $CO_{2 \text{ st atm}} = 0.37$ ,  $CO_{2 \text{ sink, LOWBM}} = 0.216$ . Hence  $CO_2$  stored in OW =  $0.799 - 0.370 - 0.216 = 0.213$  Peta moles/year.  $y = CO_{2 \text{ st, Ocean}}/O_2 \text{ by FF and LU} = 0.213/1.027 = 0.207$ . The quadratic fit yields 0.19 Peta mole/year;  $CO_2$  stored by ocean, GT/year =  $y * \text{Peta mols } O_2 \text{ by FFLU} * 44.01$
